# Supplementary material
Source: publisher site journal article supplement (https://kjim.org/upload/media/kjim-2025-166-Supplementary-Table-1.pdf)
Supplement: Supplementary file 1 [file kjim-2025-166-Supplementary-Table-1.pdf]

**Supplementary Table 1. Causative drugs of the drug hypersensitivity reactions in this study**

| Causative drugs         | Total<br>(n = 668) | Immediate<br>(n = 427) | Anaphylaxis<br>(n = 143) | Delayed<br>(n = 241) | p value |
|-------------------------|--------------------|------------------------|--------------------------|----------------------|---------|
| Single drug-induced     | 331 (49.6)         | 235 (55.0)             | 46 (32.2)                | 95 (39.4)            | < 0.001 |
| Radiocontrast media     | 126 (18.9)         | 96 (22.5)              | 4 (2.8)                  | 30 (12.4)            | < 0.001 |
| Iopamidol               | 54 (42.9)          | 48 (50.0)              | 2 (50.0)                 | 6 (20.0)             |         |
| Iohexol                 | 32 (25.4)          | 23 (24.0)              | 2 (50.0)                 | 9 (30.0)             |         |
| Iomeprol                | 15 (11.9)          | 12 (12.5)              | 0 (0.0)                  | 3 (10.0)             |         |
| Iobitridol              | 12 (9.5)           | 11 (11.5)              | 0 (0.0)                  | 1 (3.3)              |         |
| Ioversol                | 7 (5.6)            | 2 (2.1)                | 0 (0.0)                  | 5 (16.7)             |         |
| Iodixanol               | 5 (4.0)            | 0 (0.0)                | 0 (0.0)                  | 5 (16.7)             |         |
| Gadobutrol              | 1 (0.8)            | 0 (0.0)                | 0 (0.0)                  | 1 (3.3)              |         |
| NSAIDs                  | 96 (14.4)          | 72 (16.9)              | 21 (14.7)                | 24 (10.0)            | 0.114   |
| Ketorolac               | 16 (16.7)          | 15 (20.8)              | 4 (19.0)                 | 1 (4.2)              |         |
| Dexibuprofen            | 13 (13.5)          | 10 (13.9)              | 3 (14.3)                 | 3 (12.5)             |         |
| Acetaminophen           | 11 (11.5)          | 7 (9.7)                | 3 (14.3)                 | 4 (16.7)             |         |
| Propacetamol            | 10 (10.4)          | 10 (13.9)              | 3 (14.3)                 | 0 (0.0)              |         |
| Naproxen                | 10 (10.4)          | 6 (8.3)                | 2 (9.5)                  | 4 (16.7)             |         |
| Loxoprofen              | 8 (8.3)            | 6 (8.3)                | 2 (9.5)                  | 2 (8.3)              |         |
| Ibuprofen               | 8 (8.3)            | 5 (6.9)                | 0 (0.0)                  | 3 (12.5)             |         |
| Celecoxib               | 6 (6.2)            | 3 (4.2)                | 0 (0.0)                  | 3 (12.5)             |         |
| Aceclofenac             | 3 (3.1)            | 3 (4.2)                | 2 (9.5)                  | 0 (0.0)              |         |
| Aspirin                 | 3 (3.1)            | 1 (1.4)                | 0 (0.0)                  | 2 (8.3)              |         |
| Cloxinin                | 3 (3.1)            | 2 (2.8)                | 1 (4.8)                  | 1 (4.2)              |         |
| Diclofenac              | 2 (2.1)            | 2 (2.8)                | 0 (0.0)                  | 0 (0.0)              |         |
| Meloxicam               | 2 (2.1)            | 1 (1.4)                | 1 (4.8)                  | 1 (4.2)              |         |
| Flubiprofen             | 1 (1.0)            | 1 (1.4)                | 0 (0.0)                  | 0 (0.0)              |         |
| Beta lactams            | 41 (6.1)           | 27 (6.3)               | 8 (5.6)                  | 14 (5.8)             | 0.004   |
| Penicillin class        |                    |                        |                          |                      |         |
| Amoxicillin/clavulanate | 7 (17.1)           | 2 (7.4)                | 1 (12.5)                 | 5 (35.7)             |         |
| Amoxicillin             | 3 (7.3)            | 1 (3.7)                | 0 (0.0)                  | 2 (14.3)             |         |
| Piperacillin/tazobactam | 1 (2.4)            | 1 (3.7)                | 0 (0.0)                  | 0 (0.0)              |         |
| Penicillin              | 1 (2.4)            | 1 (3.7)                | 1 (12.5)                 | 0 (0.0)              |         |
| Cephalosporin class     |                    |                        |                          |                      |         |
| 1st generation          |                    |                        |                          |                      |         |
| Cefalexin               | 1 (2.4)            | 0 (0.0)                | 0 (0.0)                  | 1 (7.1)              |         |
| Cephadrine              | 1 (2.4)            | 0 (0.0)                | 0 (0.0)                  | 1 (7.1)              |         |
| 2nd generation          |                    |                        |                          |                      |         |
| Cefaclor                | 16 (39.0)          | 14 (51.9)              | 6 (75.0)                 | 2 (14.3)             |         |
| 3rd generation          |                    |                        |                          |                      |         |
| Ceftriaxone             | 8 (19.5)           | 7 (25.9)               | 0 (0.0)                  | 1 (7.1)              |         |
| Cefpodoxime             | 1 (2.4)            | 1 (3.7)                | 0 (0.0)                  | 0 (0.0)              |         |
| Ceftamet                | 1 (2.4)            | 0 (0.0)                | 0 (0.0)                  | 1 (7.1)              |         |
| Cefixime                | 1 (2.4)            | 0 (0.0)                | 0 (0.0)                  | 1 (7.1)              |         |
| Other antibiotics       | 25 (3.7)           | 14 (3.3)               | 3 (2.1)                  | 11 (4.6)             | 0.096   |
| Fluoroquinolone         |                    |                        |                          |                      |         |
| Ciprofloxacin           | 10 (40.0)          | 9 (64.3)               | 1 (33.3)                 | 1 (9.1)              |         |
| Ciprofloxacin           | 6 (24.0)           | 5 (35.7)               | 0 (0.0)                  | 1 (9.1)              |         |
| Levofloxacin            | 3 (12.0)           | 3 (21.4)               | 0 (0.0)                  | 0 (0.0)              |         |
| Ofloxacin               | 1 (4.0)            | 1 (7.1)                | 1 (33.3)                 | 0 (0.0)              |         |

Supplementary Table 1. Continued

| Causative drugs                | Total<br>(n = 668) | Immediate<br>(n = 427) | Anaphylaxis<br>(n = 143) | Delayed<br>(n = 241) | p value |
|--------------------------------|--------------------|------------------------|--------------------------|----------------------|---------|
| Antituberculosis drugs         | 3 (12.0)           | 2 (14.2)               | 0 (0.0)                  | 1 (9.1)              |         |
| Rifampin                       | 2 (8.0)            | 1 (7.1)                | 0 (0.0)                  | 1 (9.1)              |         |
| Ethambutol                     | 1 (4.0)            | 1 (7.1)                | 0 (0.0)                  | 0 (0.0)              |         |
| Tetracycline                   | 3 (12.0)           | 0 (0.0)                | 0 (0.0)                  | 3 (27.3)             |         |
| Itraconazole                   | 2 (8.0)            | 1 (7.1)                | 1 (33.3)                 | 1 (9.1)              |         |
| Minocycline                    | 2 (8.0)            | 1 (7.1)                | 1 (33.3)                 | 1 (9.1)              |         |
| Lincosamide                    | 1 (4.0)            | 0 (0.0)                | 0 (0.0)                  | 1 (9.1)              |         |
| Macrolide                      | 1 (4.0)            | 0 (0.0)                | 0 (0.0)                  | 1 (9.1)              |         |
| Metronidazole                  | 1 (4.0)            | 0 (0.0)                | 0 (0.0)                  | 1 (9.1)              |         |
| Clindamycin                    | 1 (4.0)            | 1 (7.1)                | 0 (0.0)                  | 0 (0.0)              |         |
| Oseltamivir                    | 1 (4.0)            | 0 (0.0)                | 0 (0.0)                  | 1 (9.1)              |         |
| Gastrointestinal drugs         | 16 (2.4)           | 15 (3.5)               | 8 (5.6)                  | 1 (0.4)              | 0.187   |
| Cimetropium bromide            | 10 (62.5)          | 10 (66.7)              | 7 (87.5)                 | 0 (0.0)              |         |
| Metoclopramide                 | 3 (18.8)           | 3 (20.0)               | 1 (12.5)                 | 0 (0.0)              |         |
| Buscopan                       | 1 (6.2)            | 1 (6.7)                | 0 (0.0)                  | 0 (0.0)              |         |
| Famotidine                     | 1 (6.2)            | 1 (6.7)                | 0 (0.0)                  | 0 (0.0)              |         |
| Tegoprazan                     | 1 (6.2)            | 0 (0.0)                | 0 (0.0)                  | 1 (100.0)            |         |
| Other analgesics               | 3 (0.4)            | 2 (0.5)                | 0 (0.0)                  | 1 (0.4)              | > 0.999 |
| Nefopam                        | 1 (33.3)           | 1 (50.0)               | 0 (0.0)                  | 0 (0.0)              |         |
| Tramadol                       | 1 (33.3)           | 1 (50.0)               | 0 (0.0)                  | 0 (0.0)              |         |
| Acetaminophen/chlorzoxazone    | 1 (33.3)           | 0 (0.0)                | 0 (0.0)                  | 1 (100.0)            |         |
| Anesthetics                    | 2 (0.3)            | 1 (0.2)                | 0 (0.0)                  | 1 (0.4)              | > 0.999 |
| Ketamine                       | 1 (50.0)           | 1 (100.0)              | 0 (0.0)                  | 0 (0.0)              |         |
| Lidocaine                      | 1 (50.0)           | 0 (0.0)                | 0 (0.0)                  | 1 (100.0)            |         |
| Antiepileptic drugs            | 1 (0.1)            | 0 (0.0)                | 0 (0.0)                  | 1 (0.4)              | NA      |
| Lamotrigine                    | 1 (100.0)          | 0 (0.0)                | 0 (0.0)                  | 1 (100.0)            |         |
| Miscellaneous                  | 21 (3.1)           | 8 (1.9)                | 2 (1.4)                  | 13 (5.4)             | 0.447   |
| Hormonal agent                 | 6 (28.7)           | 1 (12.5)               | 0 (0.0)                  | 5 (38.5)             |         |
| Drospirenone/estradiol         | 3 (14.3)           | 0 (0.0)                | 0 (0.0)                  | 3 (23.1)             |         |
| Ganirelix                      | 1 (4.8)            | 0 (0.0)                | 0 (0.0)                  | 1 (7.7)              |         |
| hCG                            | 1 (4.8)            | 1 (12.5)               | 0 (0.0)                  | 0 (0.0)              |         |
| Progesterone                   | 1 (4.8)            | 0 (0.0)                | 0 (0.0)                  | 1 (7.7)              |         |
| Vaccine                        | 4 (19.1)           | 1 (12.5)               | 0 (0.0)                  | 3 (23.1)             |         |
| Influenza vaccine              | 2 (9.5)            | 1 (12.5)               | 0 (0.0)                  | 1 (7.7)              |         |
| Covid-19 vaccine               | 1 (4.8)            | 0 (0.0)                | 0 (0.0)                  | 1 (7.7)              |         |
| Pneumococcal conjugate vaccine | 1 (4.8)            | 0 (0.0)                | 0 (0.0)                  | 1 (7.7)              |         |
| Antihistamine                  | 2 (9.6)            | 2 (25.0)               | 0 (0.0)                  | 0 (0.0)              |         |
| Cetirizine                     | 1 (4.8)            | 1 (12.5)               | 0 (0.0)                  | 0 (0.0)              |         |
| Olopatadine                    | 1 (4.8)            | 1 (12.5)               | 0 (0.0)                  | 0 (0.0)              |         |
| Anticancer drug                | 2 (9.6)            | 0 (0.0)                | 0 (0.0)                  | 2 (15.4)             |         |
| Docetaxel                      | 1 (4.8)            | 0 (0.0)                | 0 (0.0)                  | 1 (7.7)              |         |

**Supplementary Table 1. Continued**

| Causative drugs                           | Total<br>(n = 668) | Immediate<br>(n = 427) | Anaphylaxis<br>(n = 143) | Delayed<br>(n = 241) | <i>p</i> value |
|-------------------------------------------|--------------------|------------------------|--------------------------|----------------------|----------------|
| Pembrolizumab                             | 1 (4.8)            | 0 (0.0)                | 0 (0.0)                  | 1 (7.7)              |                |
| Dexamethasone                             | 2 (9.5)            | 1 (12.5)               | 1 (50.0)                 | 1 (7.7)              |                |
| Amiodarone                                | 1 (4.8)            | 1 (12.5)               | 0 (0.0)                  | 0 (0.0)              |                |
| Botulinum toxin type A                    | 1 (4.8)            | 1 (12.5)               | 1 (50.0)                 | 0 (0.0)              |                |
| Erdosteine                                | 1 (4.8)            | 1 (12.5)               | 0 (0.0)                  | 0 (0.0)              |                |
| Levocloperastine                          | 1 (4.8)            | 0 (0.0)                | 0 (0.0)                  | 1 (7.7)              |                |
| Liraglutide                               | 1 (4.8)            | 0 (0.0)                | 0 (0.0)                  | 1 (7.7)              |                |
| Multiple suspected drug reactions         | 337 (50.5)         | 192 (45.0)             | 97 (67.8)                | 145 (60.2)           | NA             |
| NSAIDs + $\beta$ -lactams                 | 119 (35.3)         | 82 (42.7)              | 51 (52.6)                | 37 (25.5)            |                |
| NSAIDs + Muscle relaxants                 | 45 (13.4)          | 28 (14.6)              | 13 (13.4)                | 17 (11.7)            |                |
| NSAIDs + Gastrointestinal drugs           | 33 (9.8)           | 18 (9.4)               | 6 (6.2)                  | 15 (10.3)            |                |
| Gastrointestinal drugs combination        | 9 (2.7)            | 6 (3.1)                | 0 (0.0)                  | 3 (2.1)              |                |
| Gastrointestinal drugs + Muscle relaxants | 4 (1.2)            | 1 (0.5)                | 0 (0.0)                  | 3 (2.1)              |                |
| Other combination                         | 127 (37.7)         | 57 (29.7)              | 27 (27.8)                | 69 (47.6)            |                |

Values are presented as number (%). Percentages in parentheses for each major drug category (e.g., NSAIDs, beta lactams) indicate the proportion among all 668 single or multiple drug-induced cases. Percentages in parentheses within each drug class indicate the proportion of each specific drug among cases in that class.

NSAIDs, nonsteroidal anti-inflammatory drugs; hCG, human chorionic gonadotropin; NA, not applicable.

*p* values indicate comparisons between immediate and delayed reactions.
